# Supplementary material for: High expression of MAP7 predicts adverse prognosis in young patients with cytogenetically normal acute myeloid leukemia
Source: PubMed Central journal article supplement (PMC5043276; doi:10.1038/srep34546), 2016-09-30
Supplement: srep34546-s1.pdf [file srep34546-s1.pdf]

High expression of *MAP7* predicts adverse prognosis in young patients with cytogenetically normal acute myeloid leukemia

**Lin Fu<sup>1,2,3\*</sup>, Huaping Fu<sup>4,\*</sup>, Lei Zhou<sup>5,\*</sup>, Keman Xu<sup>6</sup>, Yifan Pang<sup>7</sup>, Kai Hu<sup>1</sup>, Jing Wang<sup>1</sup>, Lei Tian<sup>1</sup>, Yuanyuan Liu<sup>1</sup>, Jijun Wang<sup>1</sup>, Hongmei Jing<sup>1</sup>, Wenrong Huang<sup>5</sup>, Xiaoyan Ke<sup>1</sup>, Jinlong Shi<sup>2</sup>**

<sup>1</sup>Department of Hematology and Lymphoma Research Center, Peking University, Third Hospital, Beijing, 100191, China

<sup>2</sup>Department of Biomedical Engineering, Chinese PLA General Hospital, Beijing, 100853, China

<sup>3</sup>Blood Diseases Institute, Xuzhou Medical University, Xuzhou, 221002, China

<sup>4</sup>Department of nuclear medicine, Chinese PLA General Hospital, Beijing, 100853, China

<sup>5</sup>Department of Hematology, Chinese PLA General Hospital, Beijing, 100853, China

<sup>6</sup>College of medical laboratory science and technology, Harbin Medical University, Daqing, 163319, China

<sup>7</sup>Department of Medicine, William Beaumont Hospital, Royal Oak, MI, 48073, USA

\*These authors contributed equally to this work.

Correspondence and requests for materials should be addressed to:

J.L.S. (E-mail: [jinlong\\_301@163.com](mailto:jinlong_301@163.com)) or X.Y.K. (E-mail: [xiaoyank@yahoo.com](mailto:xiaoyank@yahoo.com)) or W.R.H (E-mail: [huangwr301@163.com](mailto:huangwr301@163.com))

**Table S1.** Characteristics of the 88 CN-AML patients in the second independent cohort segregated based on *MAP7* expression level

| <b>Variable</b>              | <b><i>MAP7</i><sup>high</sup>, n=44</b> | <b><i>MAP7</i><sup>low</sup>, n=44</b> | <b><i>P</i></b> |
|------------------------------|-----------------------------------------|----------------------------------------|-----------------|
| Median age. y (range)        | 46 (19-59)                              | 47(17-59)                              | 0.67            |
| FAB subtype, no (%)          |                                         |                                        |                 |
| M0                           | 0 (0.0)                                 | 3 (6.8)                                | 0.24            |
| M1                           | 13 (29.5)                               | 7 (15.9)                               | 0.21            |
| M2                           | 11 (25.0)                               | 9 (20.5)                               | 0.8             |
| M4                           | 16 (36.4)                               | 12 (27.2)                              | 0.49            |
| M5                           | 3 (6.8)                                 | 10 (22.7)                              | 0.033           |
| M6                           | 1 (2.3)                                 | 3 (6.8)                                | 0.62            |
| High <i>ERG</i> , no (%)     | 31 (70.5)                               | 13 (29.5)                              | <0.001          |
| High <i>BAALC</i> , no (%)   | 21 (47.8)                               | 23 (52.3)                              | 0.83            |
| High <i>LEF1</i> , no (%)    | 14 (31.8)                               | 30 (68.2)                              | 0.001           |
| High <i>WT1</i> , no (%)     | 34 (77.3)                               | 10 (22.7)                              | <0.001          |
| High <i>DNMT3B</i> , no (%)  | 33 (75.0)                               | 11 (25.0)                              | <0.001          |
| High <i>DNMT3A</i> , no (%)  | 28 (63.6)                               | 16 (36.4)                              | 0.02            |
| High <i>MAPKBP1</i> , no (%) | 31 (70.5)                               | 13 (29.5)                              | <0.001          |
| High <i>ITPR2</i> , no (%)   | 37 (84.1)                               | 7 (15.9)                               | <0.001          |
| High <i>ATP1B1</i> , no (%)  | 33 (75.0)                               | 11 (25.0)                              | <0.001          |

**FAB**, French-American-British classification.

High *ERG*, *BAALC*, *LEF1*, *WT1*, *DNMT3B*, *DNMT3A*, *MAPKBP1*, *ITPR2* and *ATP1B1* expression were defined as an expression level above the median of all samples, respectively.

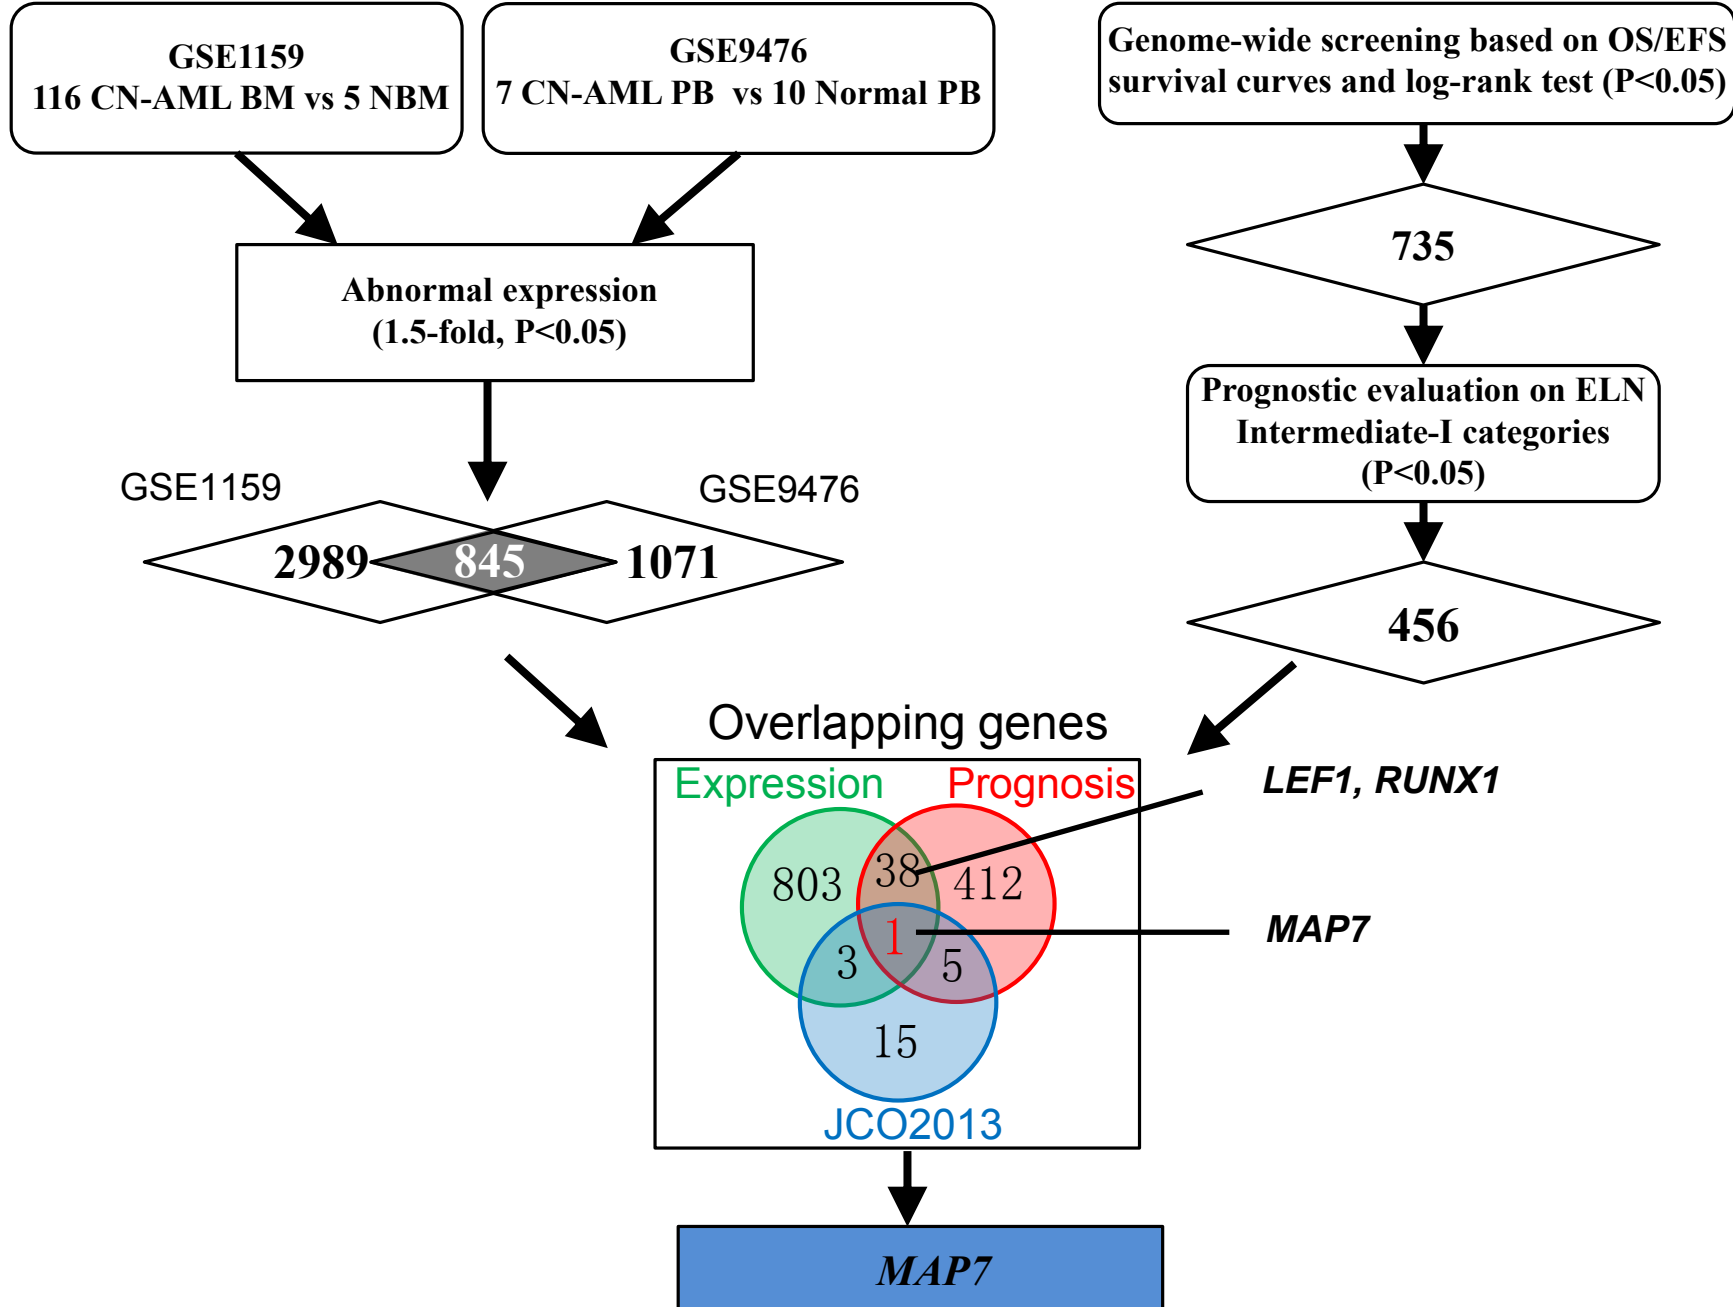

Supplementary Figure 1. A schematic diagram of the systematic strategies for uncovering the prognostic significance of *MAP7* in CN-AML patients.

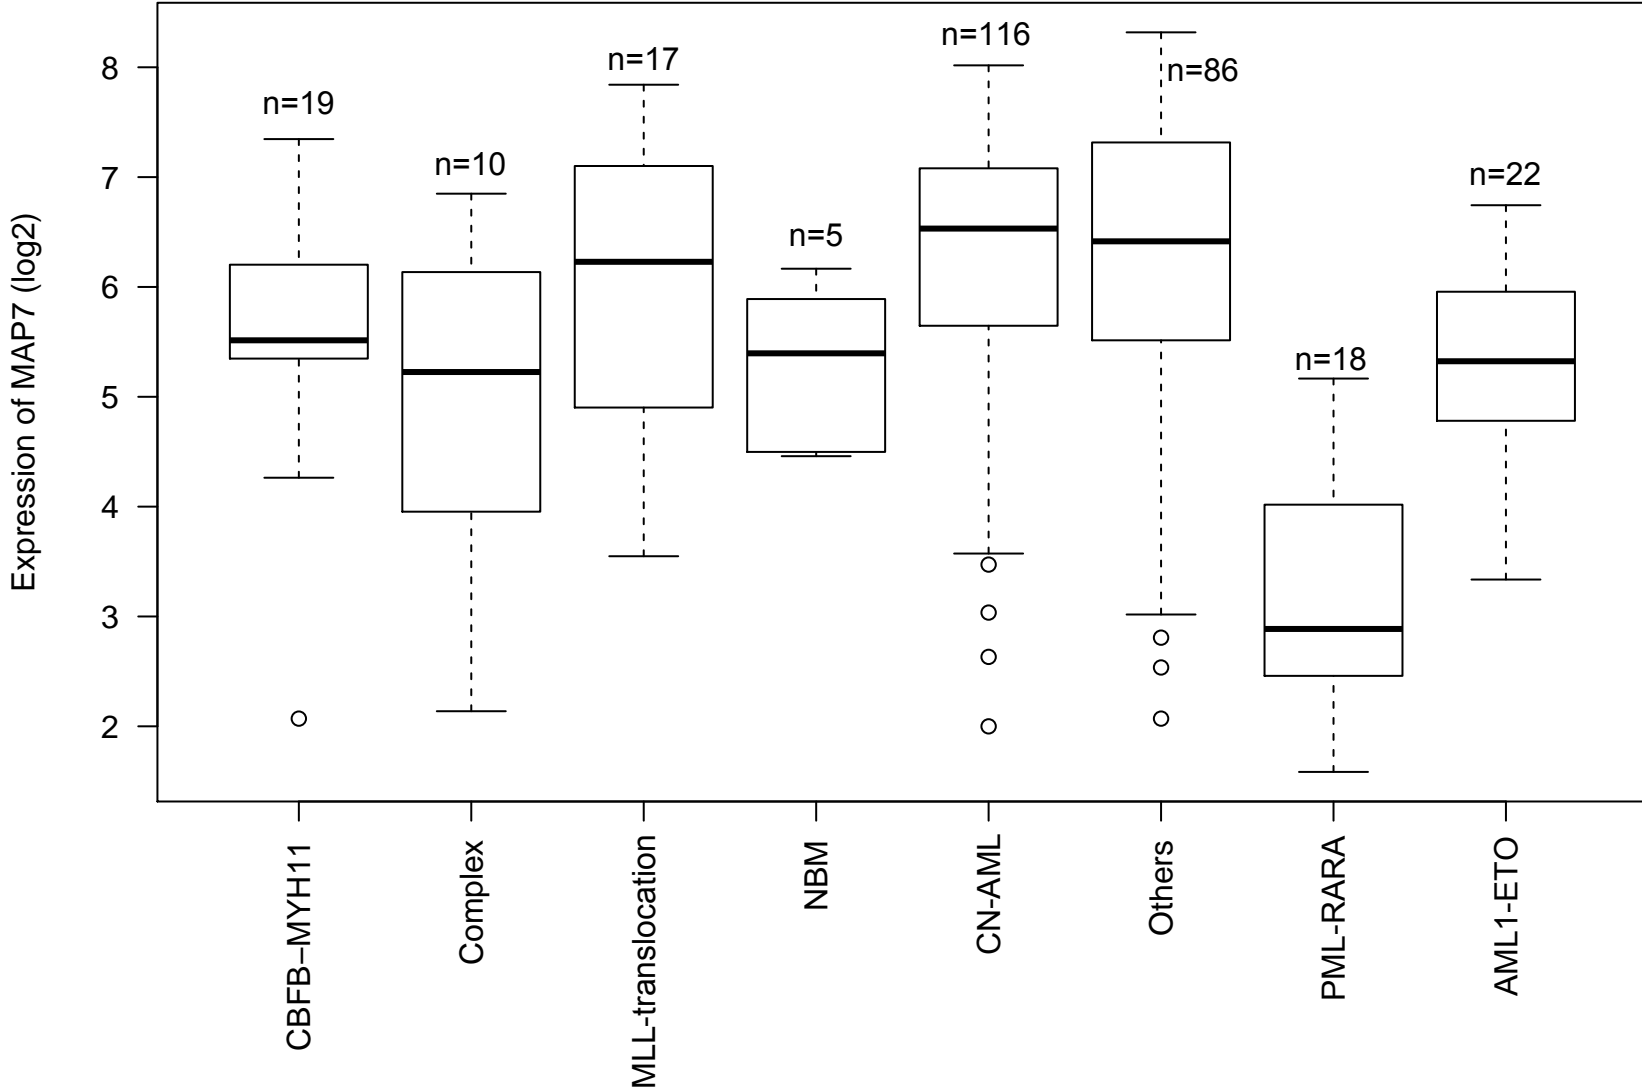

Supplementary Figure 2. MAP7 levels in various different subgroups of AML patients.

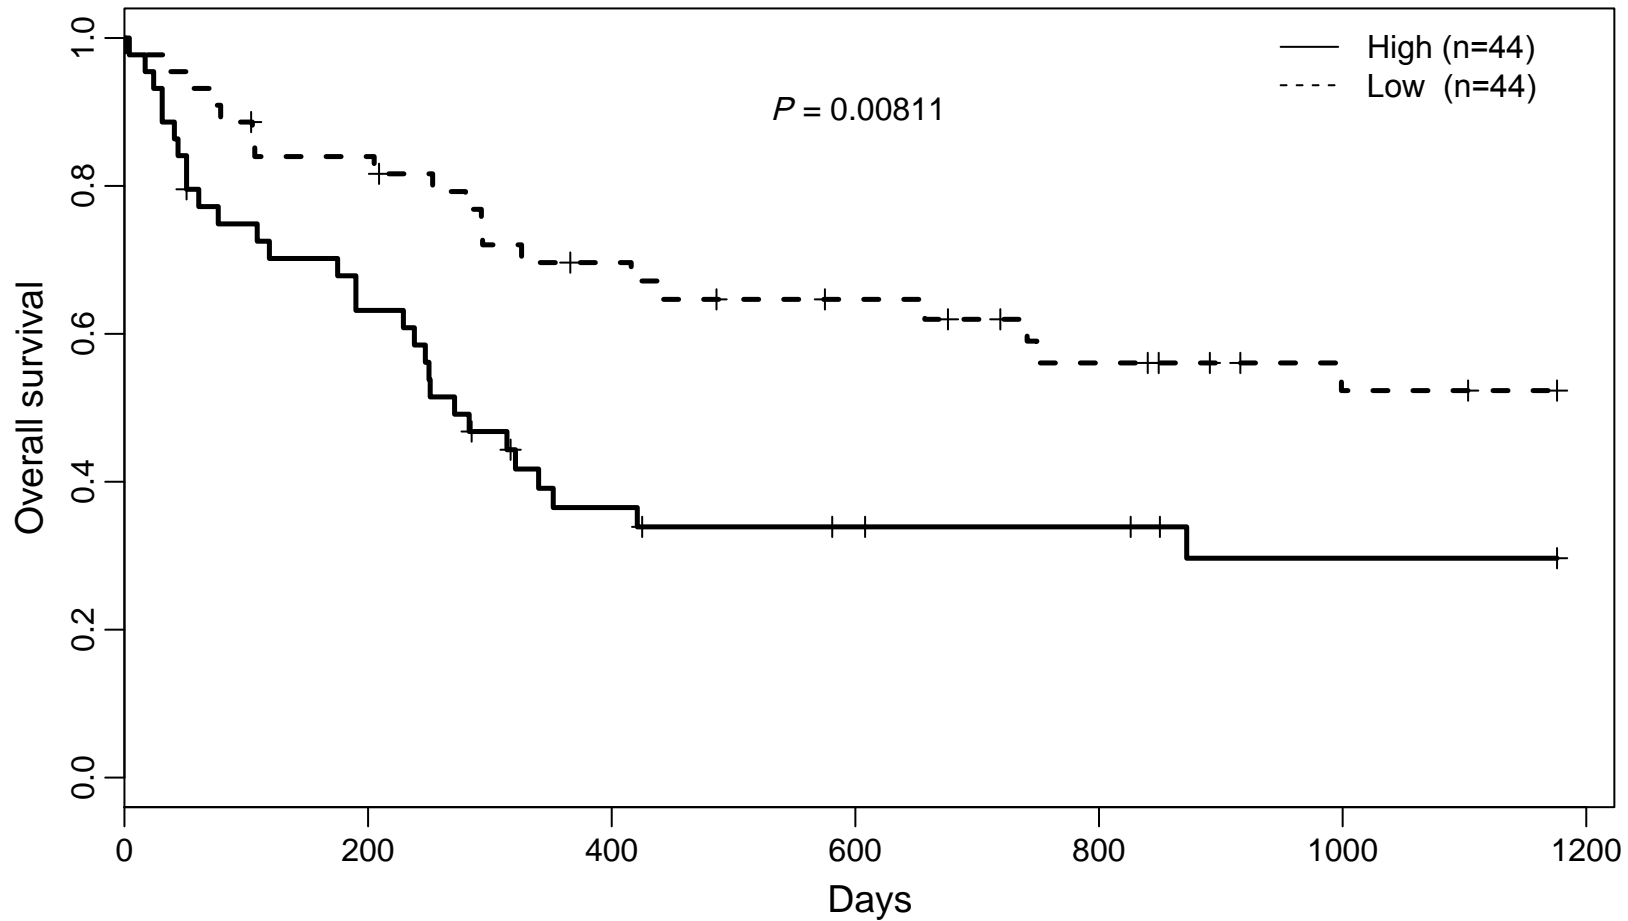

Supplementary Figure 3. OS of CN-AML patients in the second independent

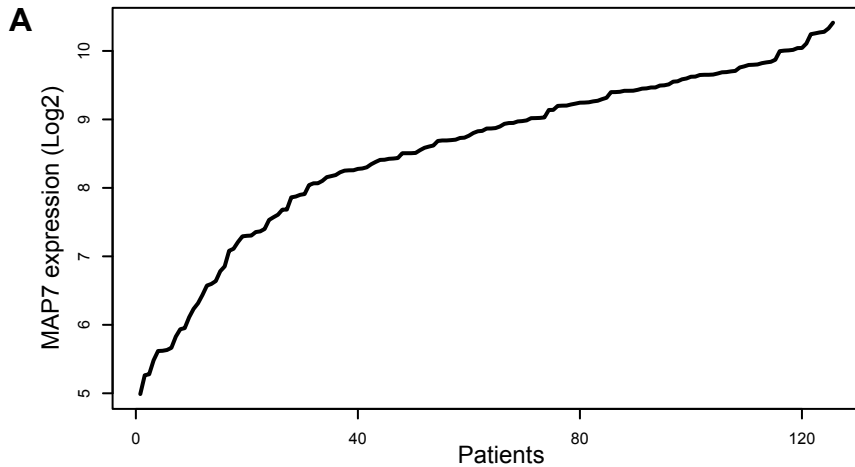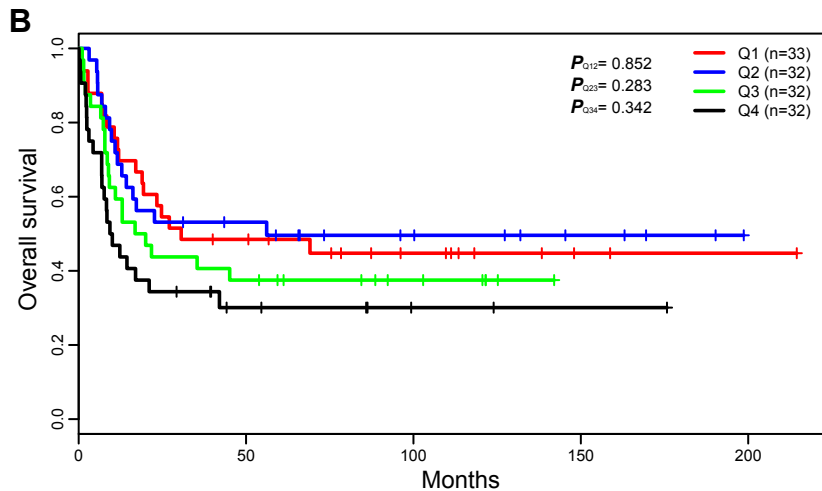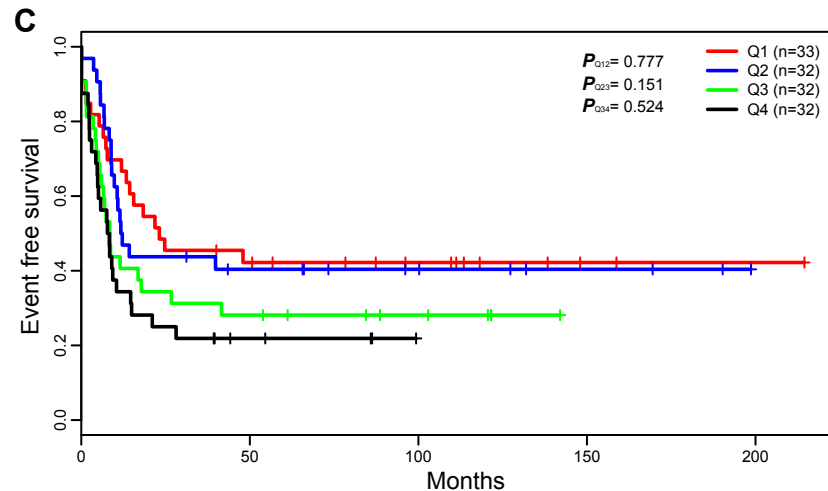

Supplementary Figure 4. Median value of *MAP7* expression as the cut-off. (A) *MAP7* expression is normally distributed. (B) OS and (C) EFS AML patients were subdivided into four quartiles based on the quartile of *MAP7* expression.
